# Supplementary material for: Synthetic Modifications of a Pb2+-Sensor Acridono-Crown Ether for Covalent Attachment and Their Effects on Selectivity
Source: Molecules. 2024 Mar 1;29(5):1121. doi: 10.3390/molecules29051121 (PMC10935152; doi:10.3390/molecules29051121)
Supplement: Supplementary file 1 [file molecules-29-01121-s001.zip › molecules-2877316-supplementary.pdf]

---

# Supplementary Material

## Synthetic Modifications of a Pb<sup>2+</sup>-Sensor Acridono-Crown Ether for Covalent Attachment and Their Effects on Selectivity

Panna Vezse <sup>1</sup>, Martin Gede <sup>1,2</sup>, Ádám Golcs <sup>1,3,\*</sup>, Péter Huszthy <sup>1</sup> and Tünde Tóth <sup>1,4,\*</sup>

<sup>1</sup> Department of Organic Chemistry and Technology, Budapest University of Technology and Economics, Szent Gellért Sq. 4, H-1111 Budapest, Hungary

<sup>2</sup> Advanced Membranes and Porous Materials Center, Physical Science and Engineering Division, King Abdullah University of Science and Technology, Thuwal 23955-6900, Saudi Arabia

<sup>3</sup> Department of Pharmaceutical Chemistry, Semmelweis University, Hőgyes Endre Str. 9, H-1092 Budapest, Hungary

<sup>4</sup> HUN-REN Centre for Energy Research, Konkoly-Thege Miklós Str. 29-33, H-1121 Budapest, Hungary

\* Correspondence: golcs.adam@semmelweis.hu (Á.G.); toth.tunde@vbk.bme.hu (T.T.)

### Contents

1. <sup>1</sup>H- and <sup>13</sup>C-NMR spectra of the new compounds
2. Investigated ions in selectivity studies

## 1. $^1\text{H}$ - and $^{13}\text{C}$ -NMR spectra of the new compounds

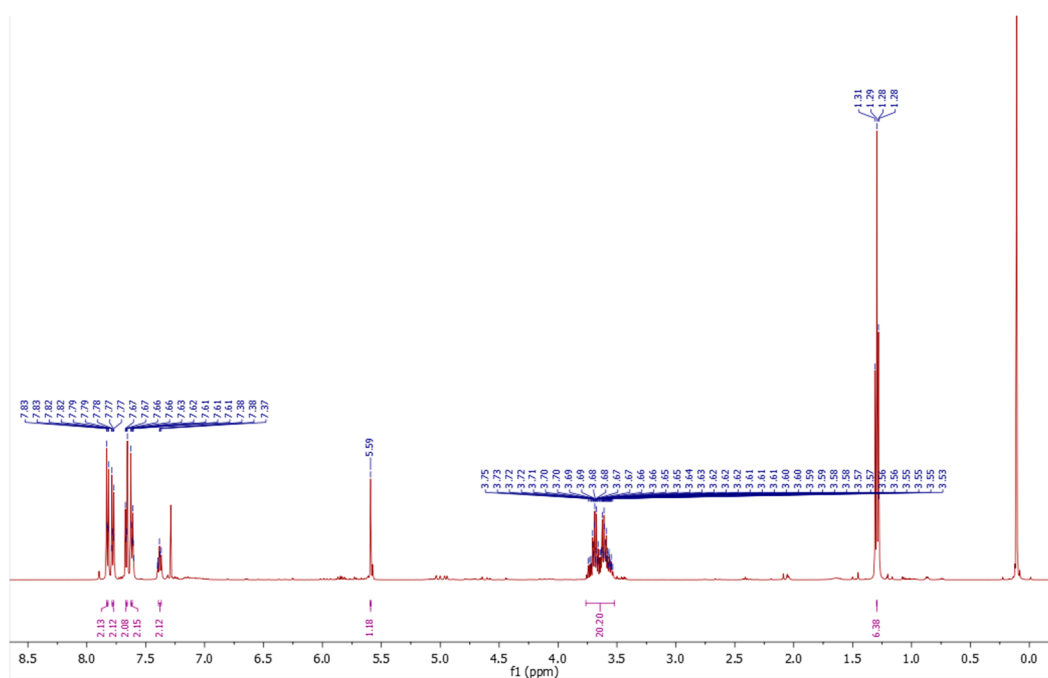

Figure S1.  $^1\text{H}$ -NMR spectrum for **16** ( $\text{CDCl}_3$ )

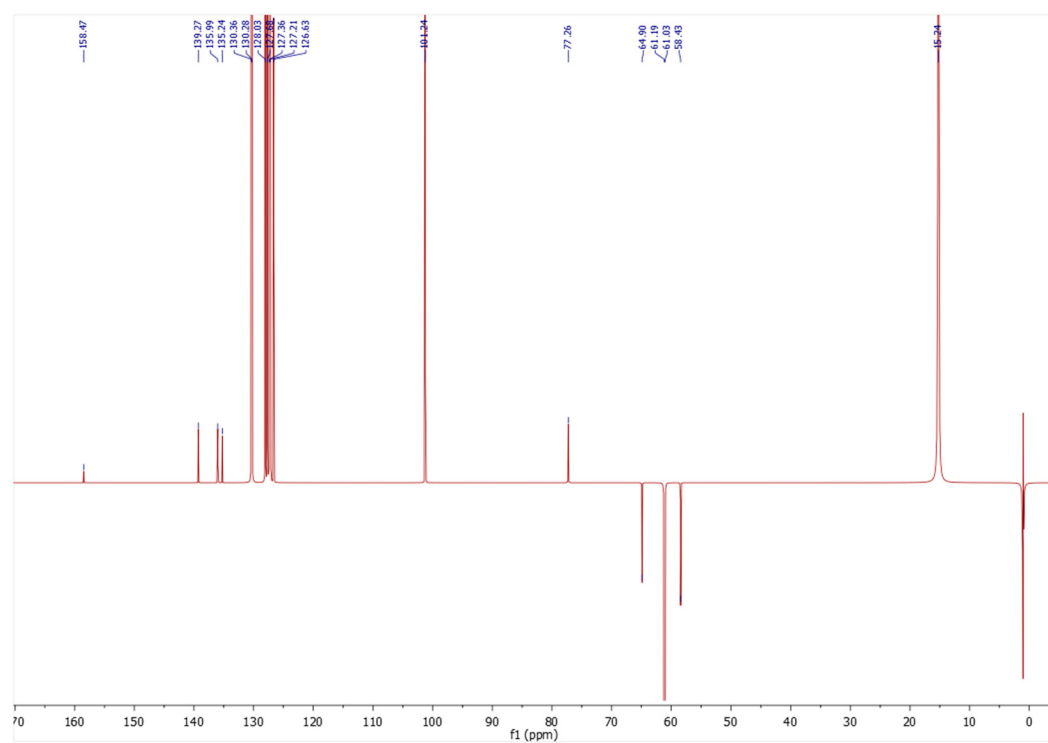

Figure S2.  $^{13}\text{C}$ -NMR spectrum for **16** ( $\text{CDCl}_3$ )

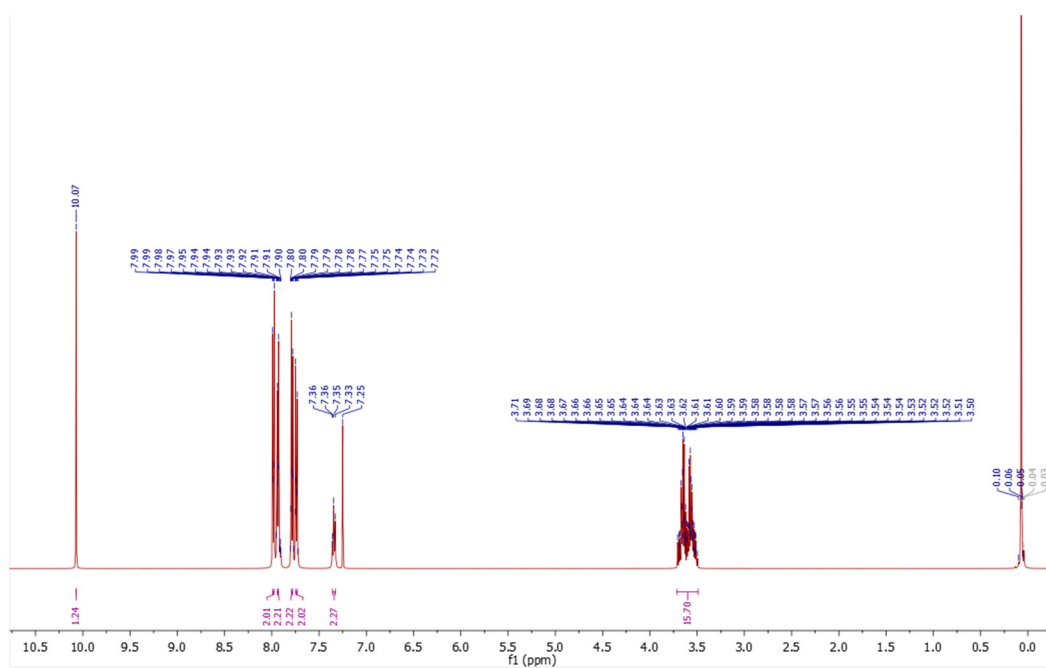

**Figure S3.** <sup>1</sup>H-NMR spectrum for **18** (CDCl<sub>3</sub>)

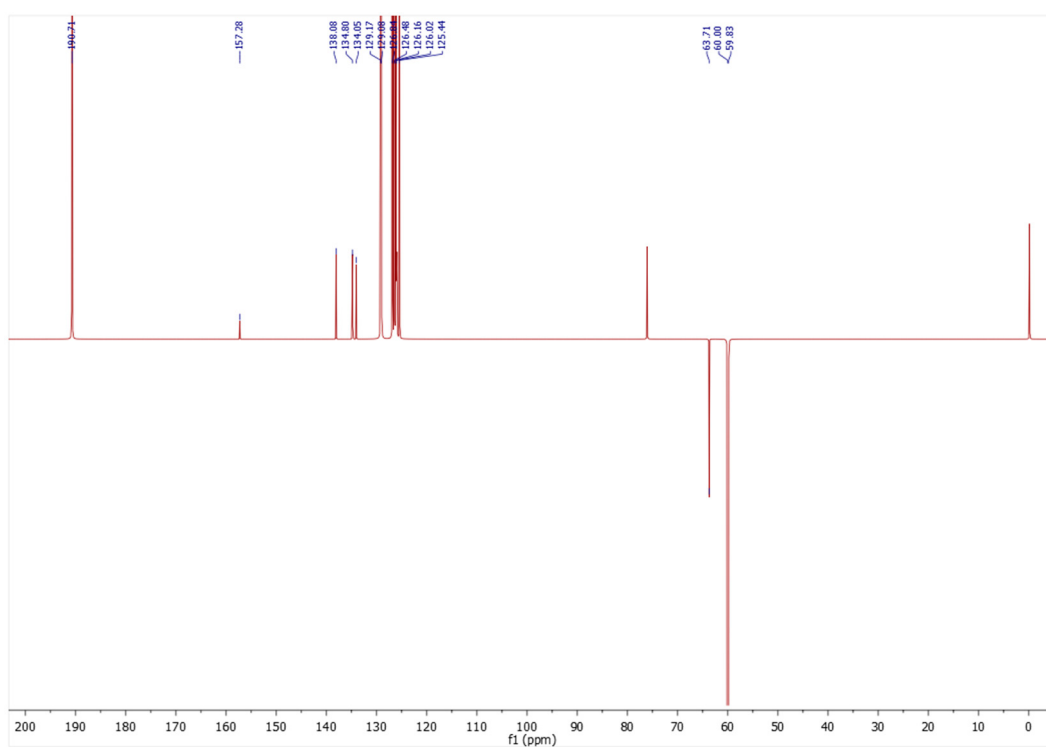

**Figure S4.** <sup>13</sup>C-NMR spectrum for **18** (CDCl<sub>3</sub>)

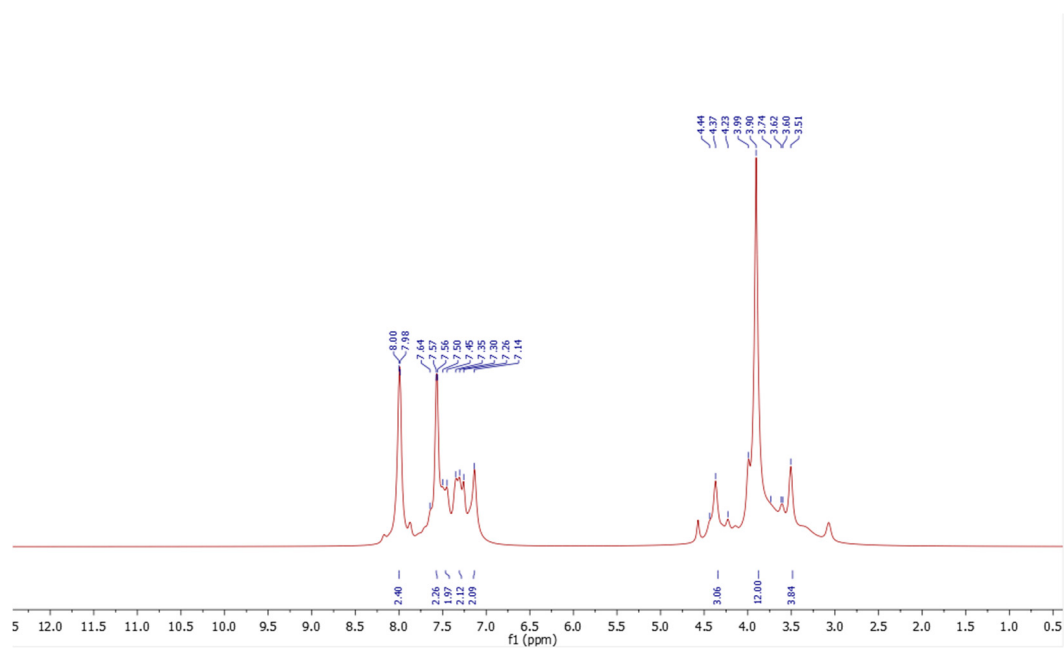

Figure S5. <sup>1</sup>H-NMR spectrum for **21** (CDCl<sub>3</sub>)

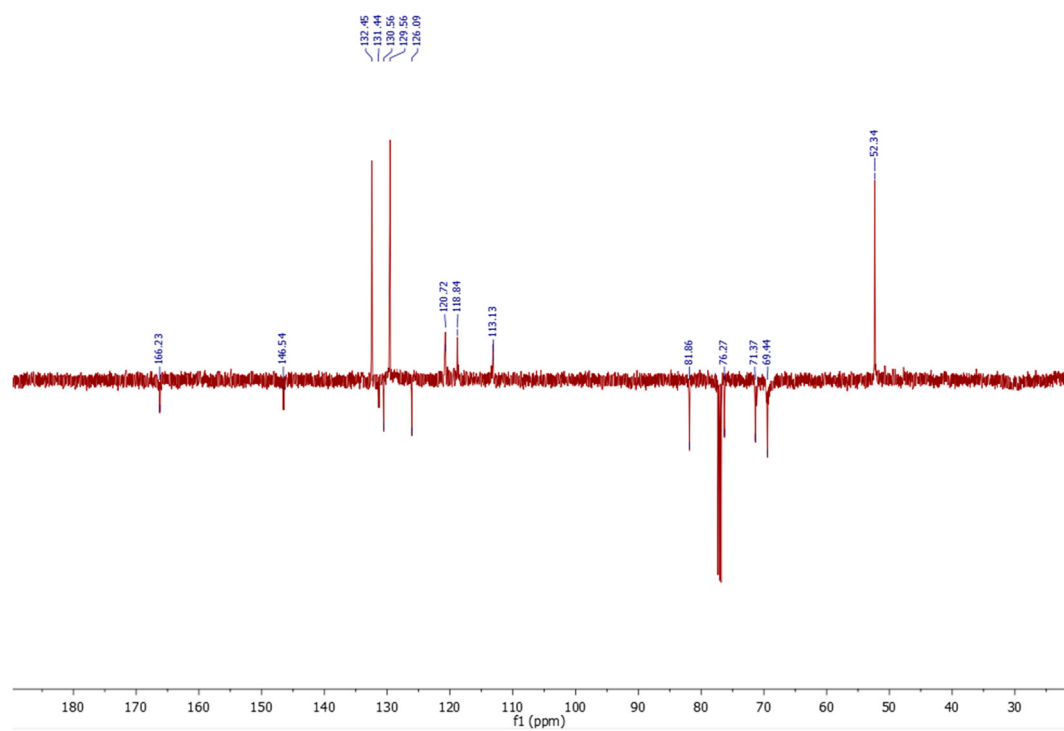

Figure S6. <sup>13</sup>C-NMR spectrum for **21** (CDCl<sub>3</sub>)

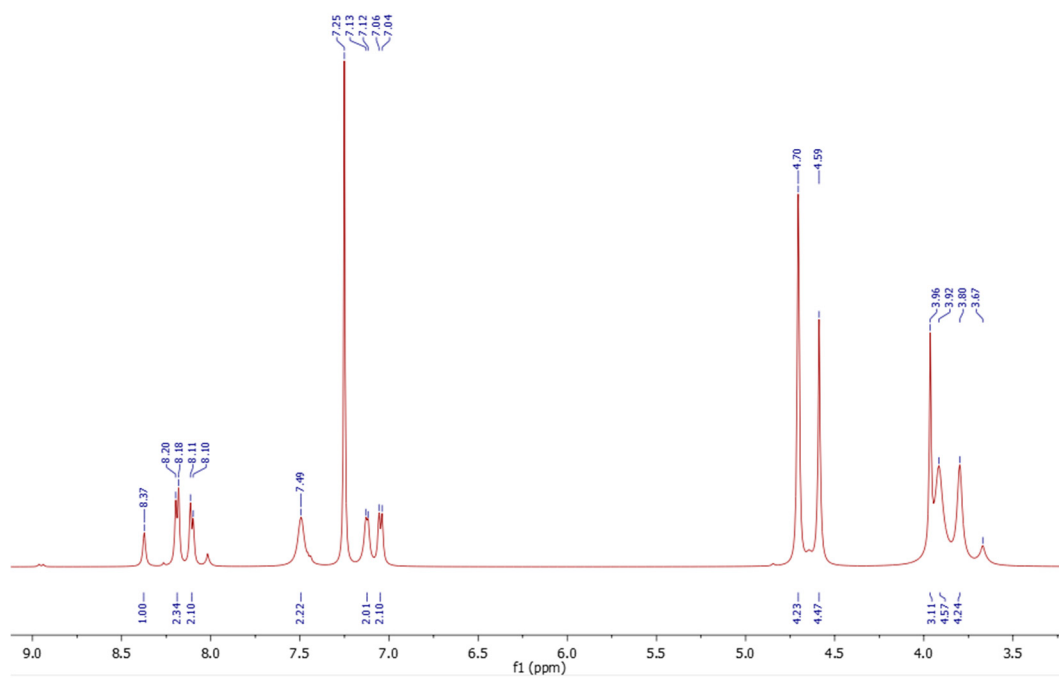

Figure S7. <sup>1</sup>H-NMR spectrum for **23** (CDCl<sub>3</sub>)

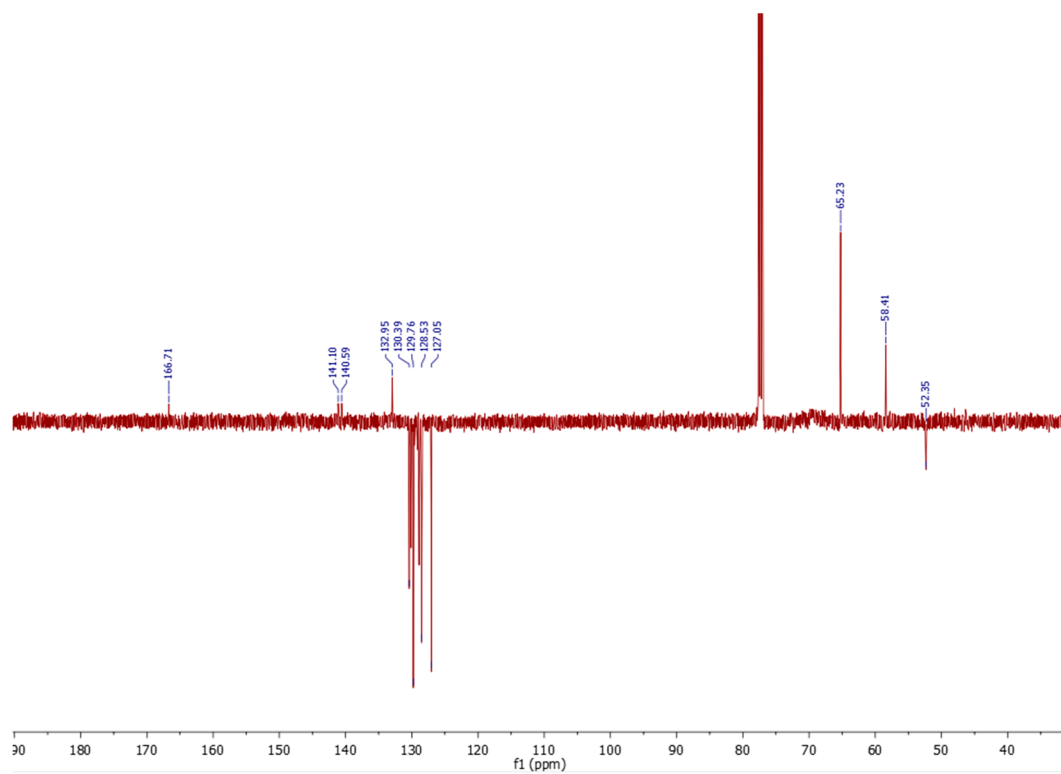

Figure S8. <sup>13</sup>C-NMR spectrum for **23** (CDCl<sub>3</sub>)

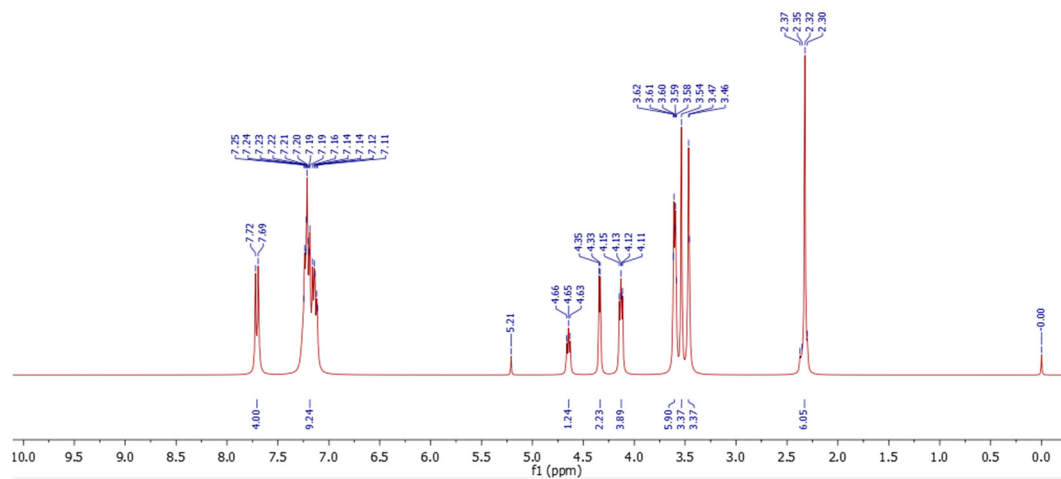

Figure S9. <sup>1</sup>H-NMR spectrum for 27 (CDCl<sub>3</sub>)

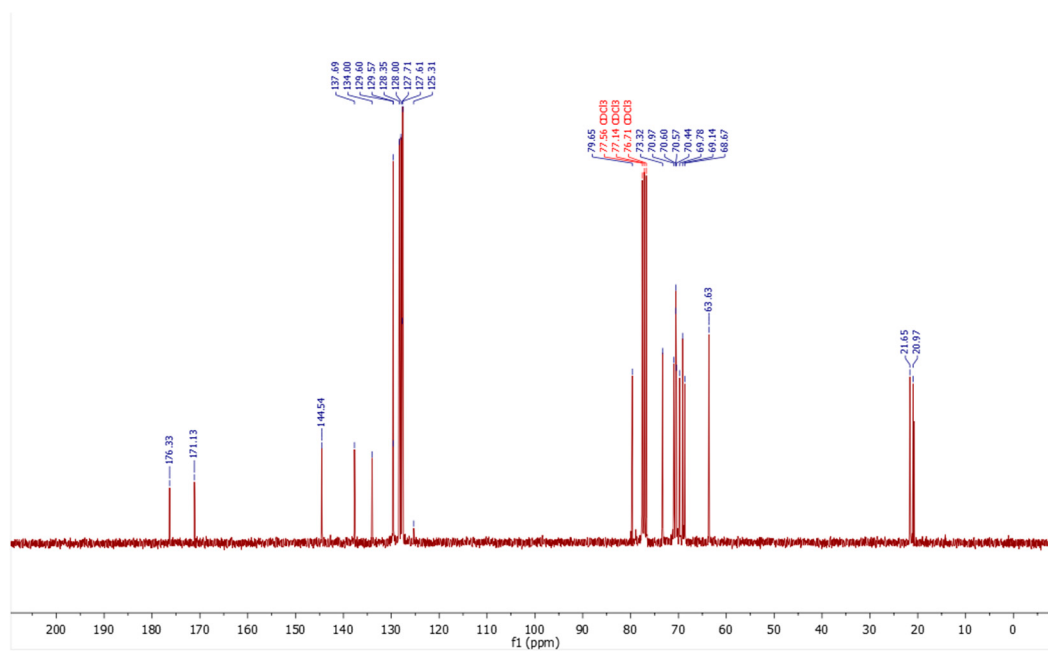

Figure S10. <sup>13</sup>C-NMR spectrum for 27 (CDCl<sub>3</sub>)

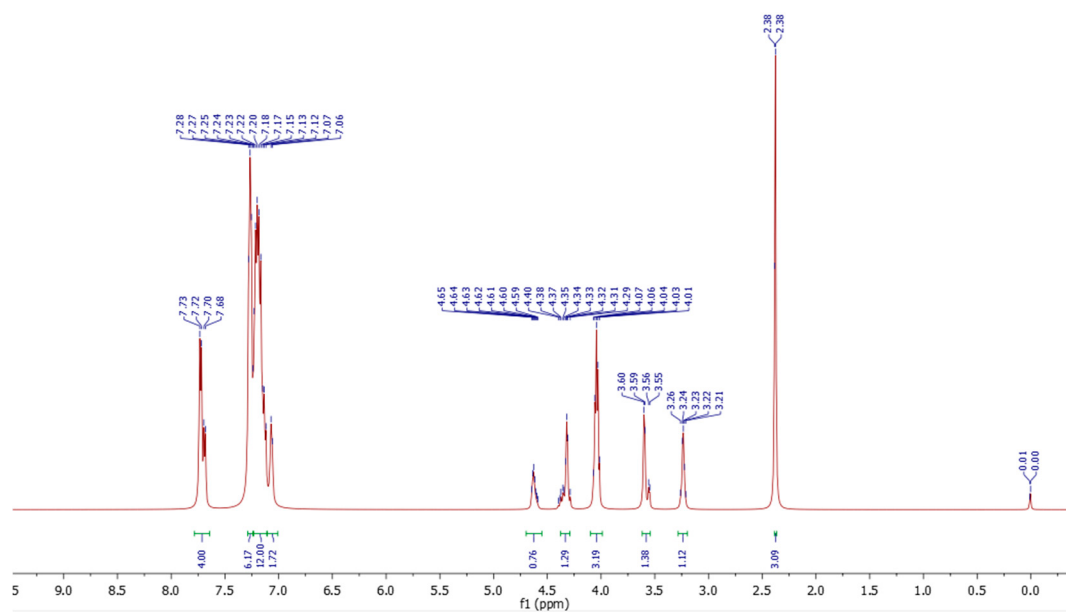

Figure S11. <sup>1</sup>H-NMR spectrum for **35** (CDCl<sub>3</sub>)

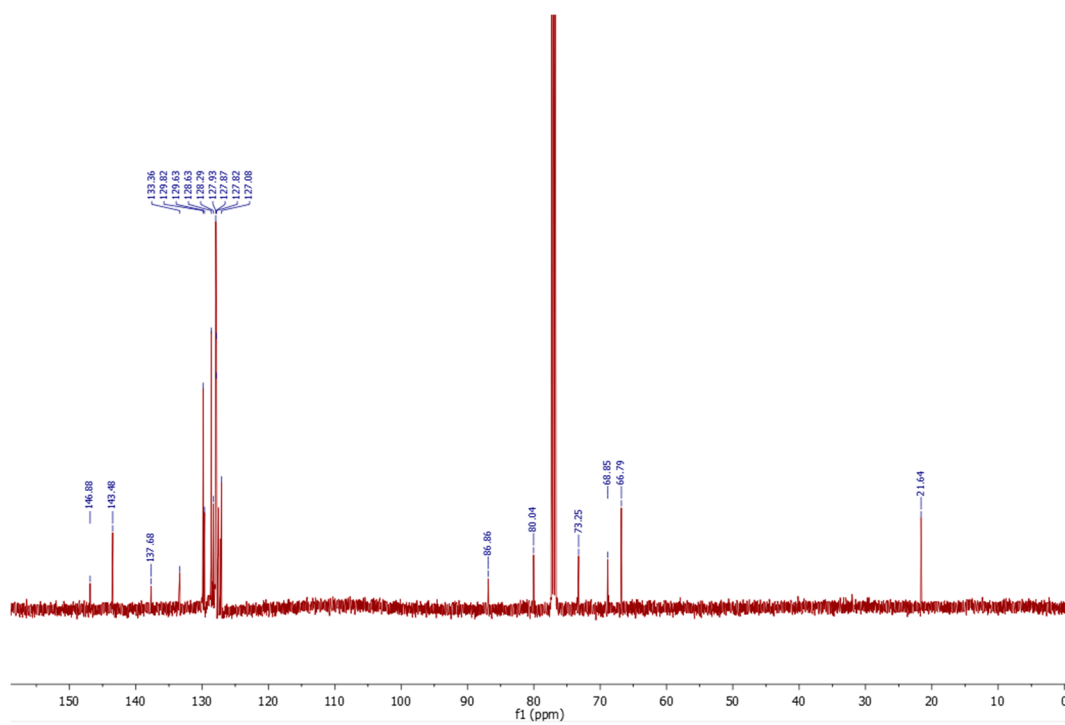

Figure S12. <sup>13</sup>C-NMR spectrum for **35** (CDCl<sub>3</sub>)

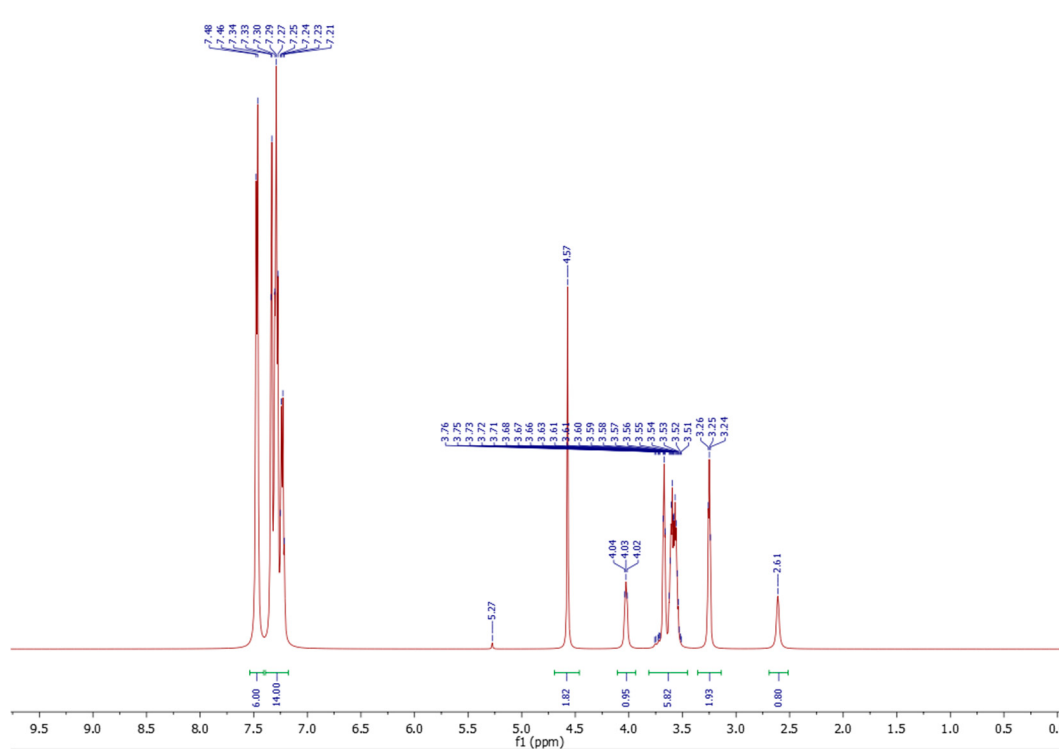

Figure S13. <sup>1</sup>H-NMR spectrum for 38 (CDCl<sub>3</sub>)

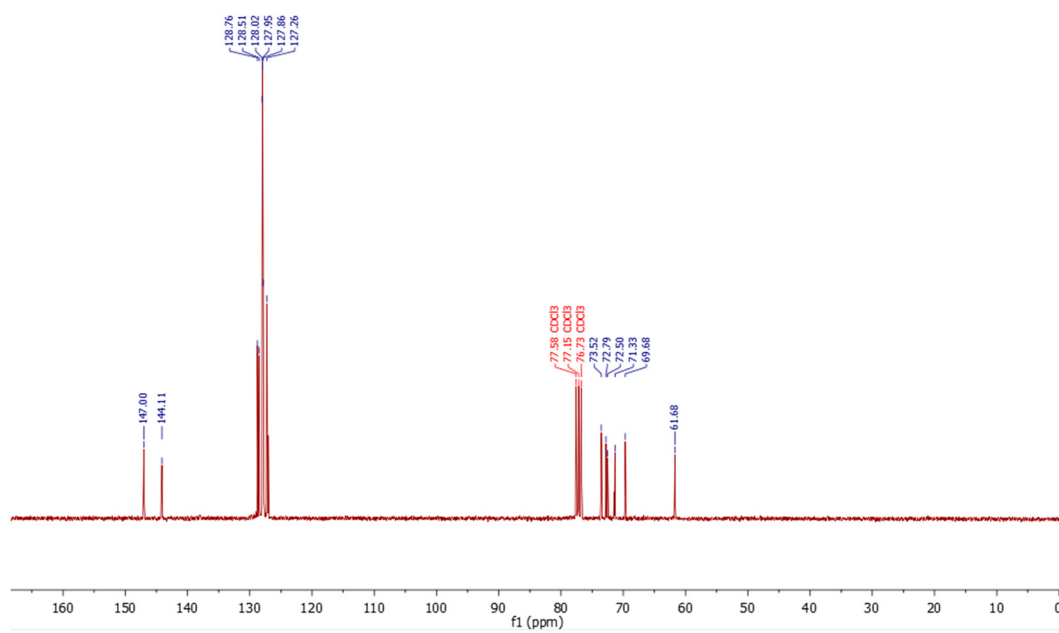

Figure S14. <sup>13</sup>C-NMR spectrum for 38 (CDCl<sub>3</sub>)

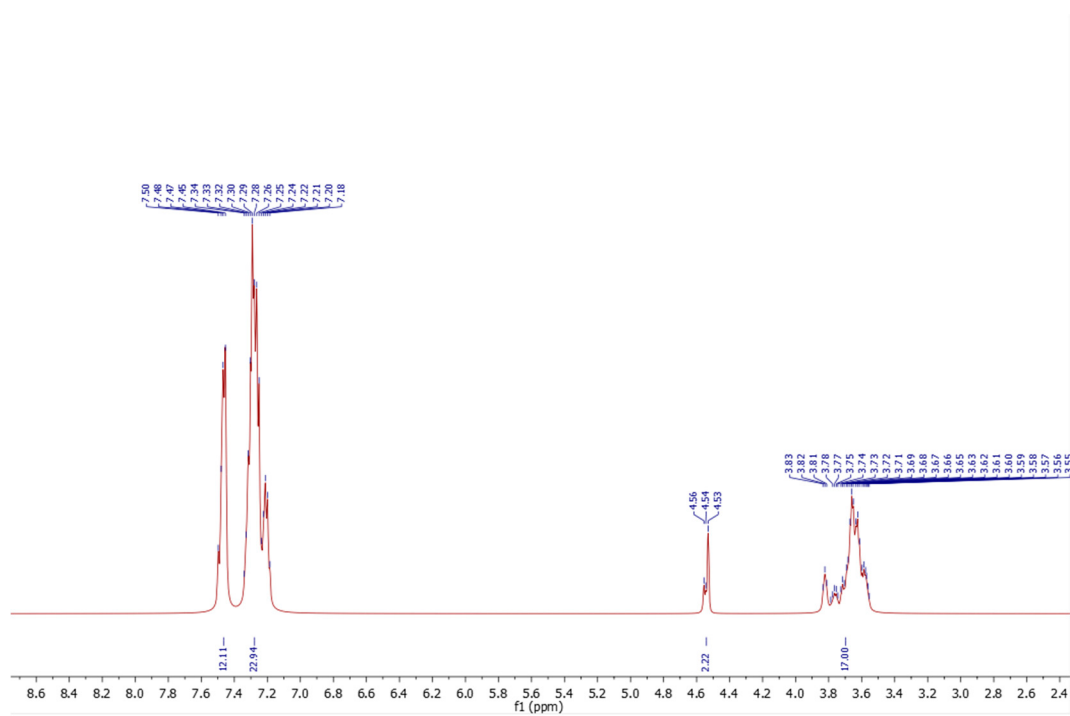

Figure S15. <sup>1</sup>H-NMR spectrum for **40** (CDCl<sub>3</sub>)

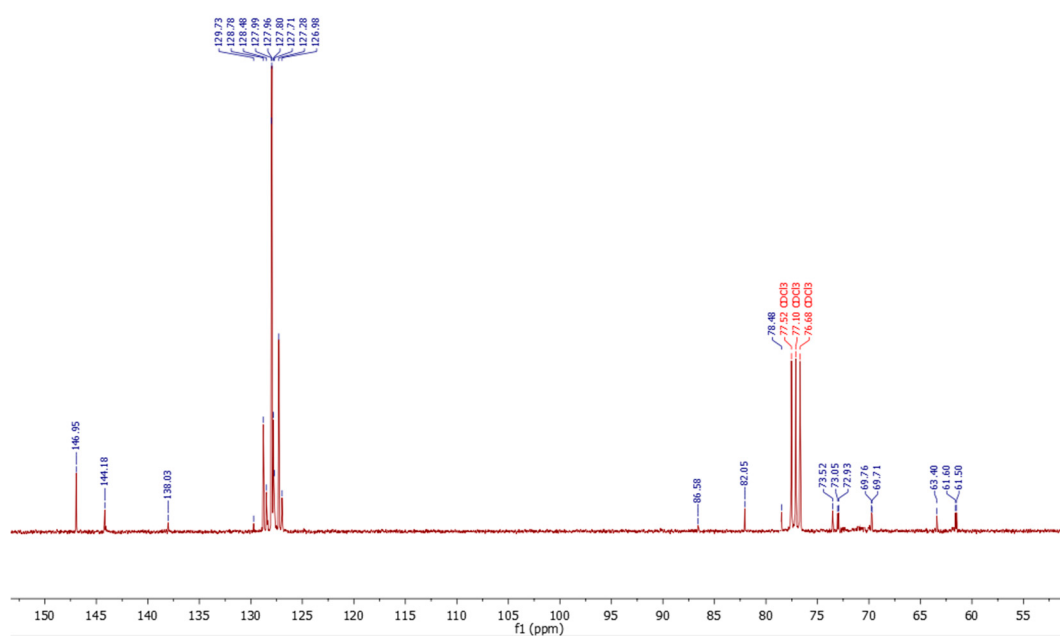

Figure S16. <sup>13</sup>C-NMR spectrum for **40** (CDCl<sub>3</sub>)

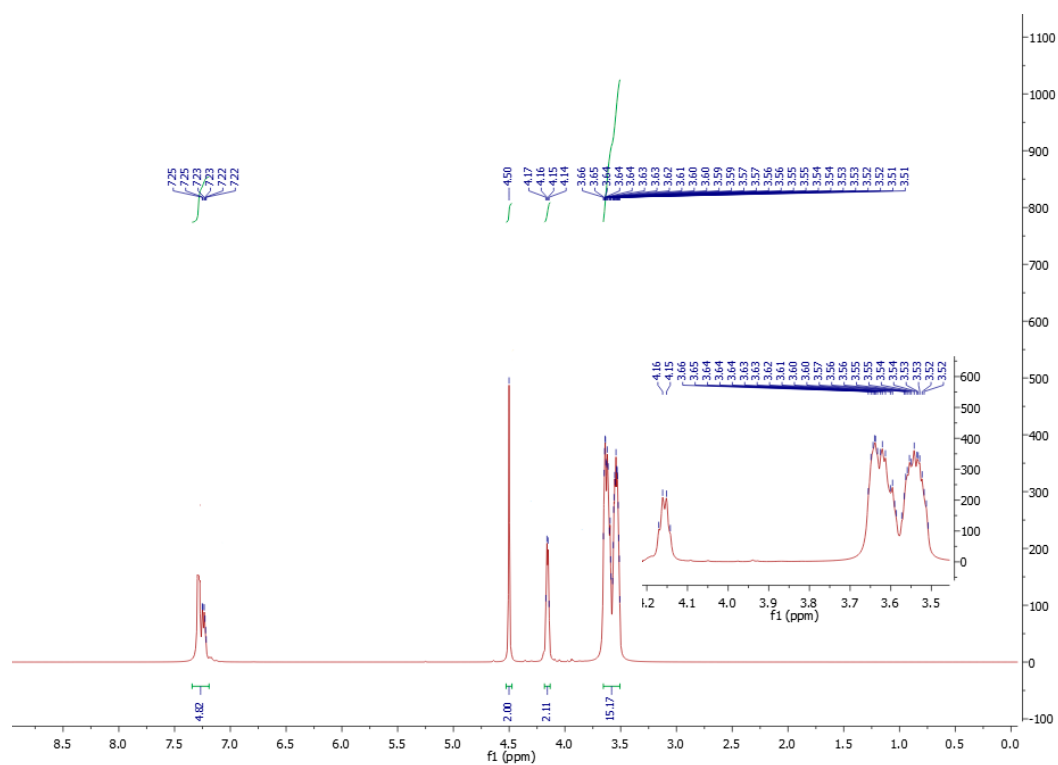

Figure S17. <sup>1</sup>H-NMR spectrum for **41** (CDCl<sub>3</sub> + D<sub>2</sub>O)

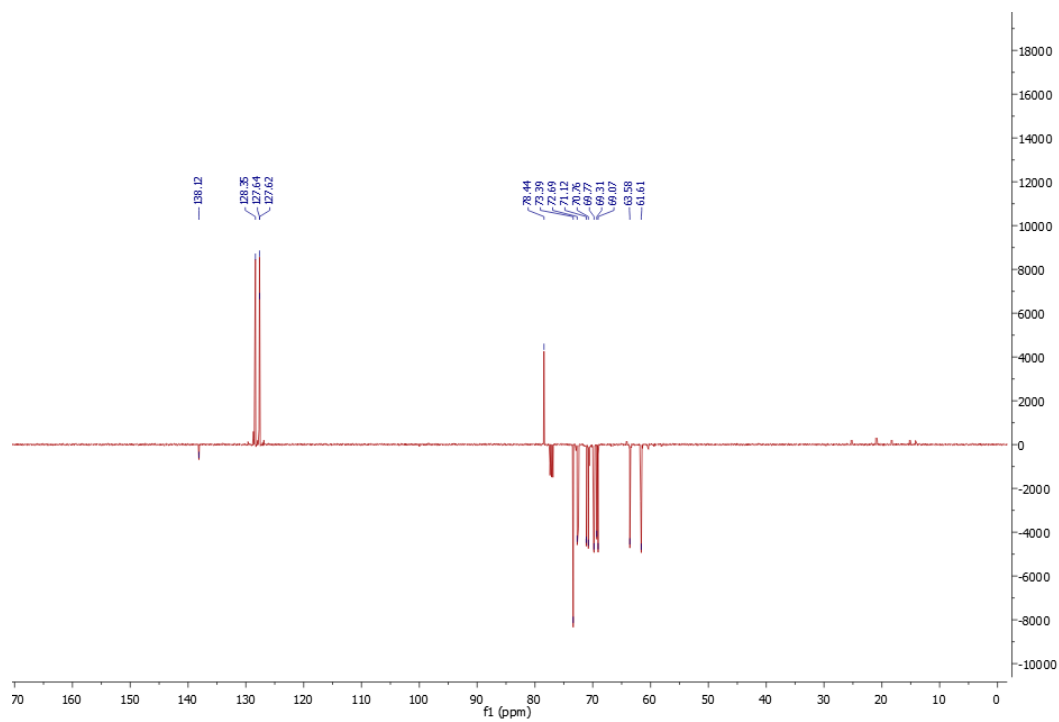

Figure S18. <sup>13</sup>C-NMR spectrum for **41** (CDCl<sub>3</sub>)

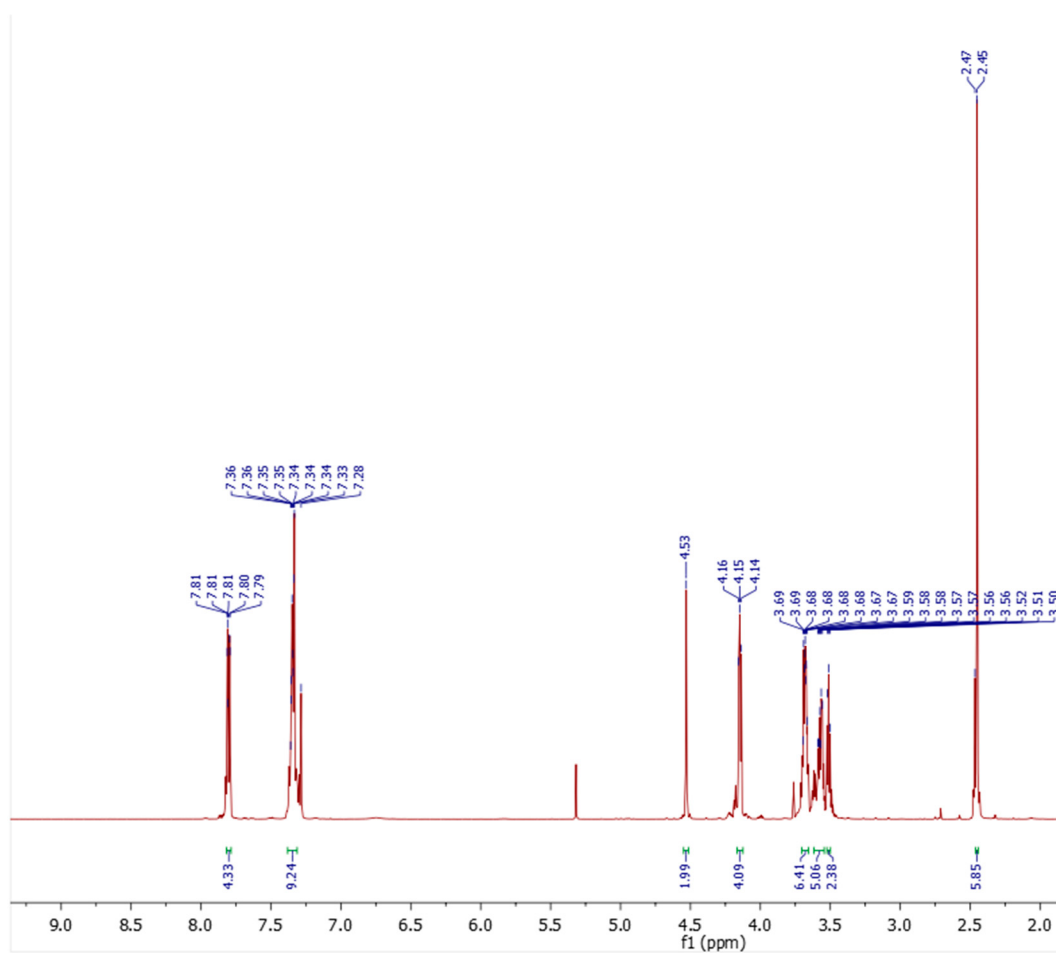

Figure S19. <sup>1</sup>H-NMR spectrum for **42** (CDCl<sub>3</sub>)

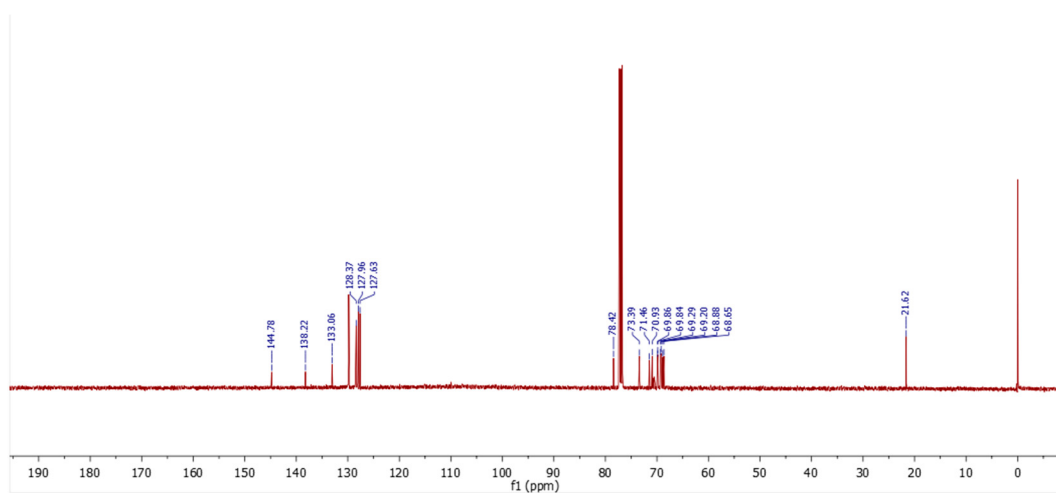

Figure S20. <sup>13</sup>C-NMR spectrum for **42** (CDCl<sub>3</sub>)

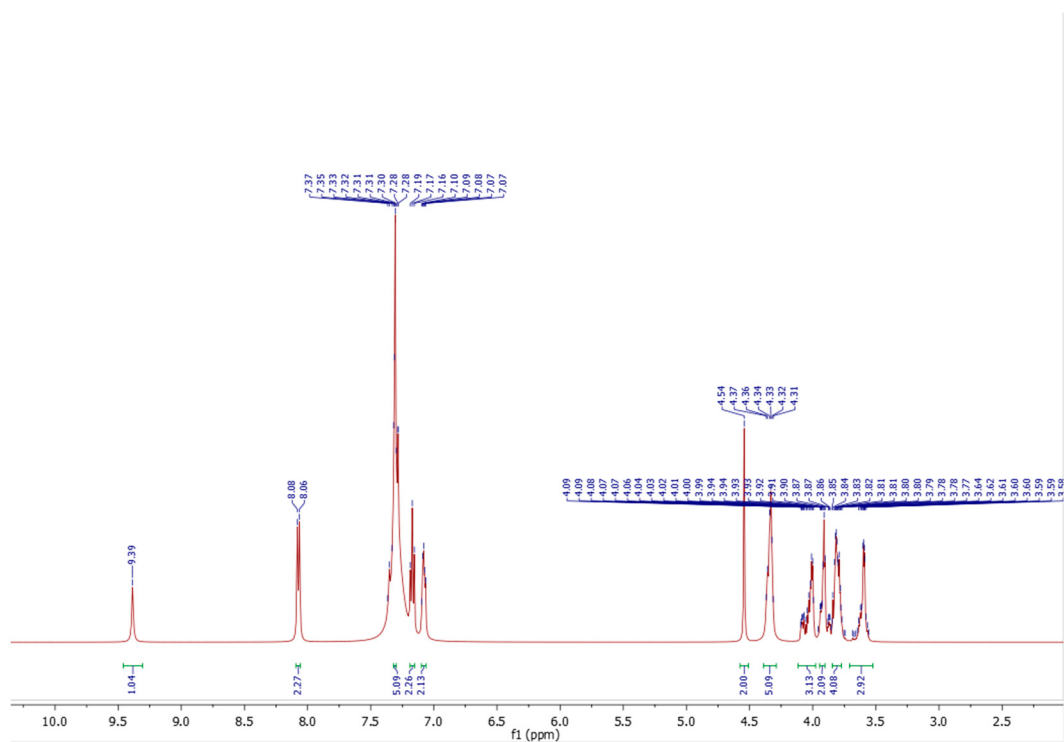

Figure S21. <sup>1</sup>H-NMR spectrum for **43** (CDCl<sub>3</sub>)

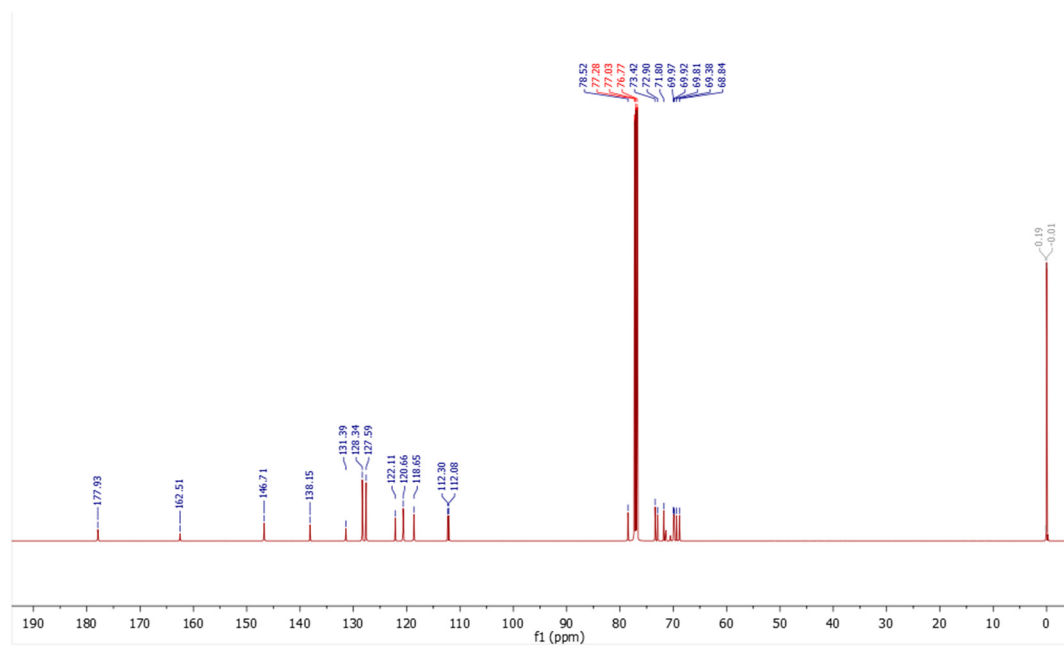

Figure S22. <sup>13</sup>C-NMR spectrum for **43** (CDCl<sub>3</sub>)

## 2. Investigated ions in selectivity studies

The synthesized new crown ethers were studied by UV-Vis spectroscopy to investigate their complexation properties toward 24 different metal ions ( $\text{Pb}^{2+}$ ,  $\text{Li}^+$ ,  $\text{Na}^+$ ,  $\text{K}^+$ ,  $\text{Rb}^+$ ,  $\text{Ag}^+$ ,  $\text{Cs}^+$ ,  $\text{Mg}^{2+}$ ,  $\text{Ca}^{2+}$ ,  $\text{Mn}^{2+}$ ,  $\text{Fe}^{2+}$ ,  $\text{Fe}^{3+}$ ,  $\text{Co}^{2+}$ ,  $\text{Ni}^{2+}$ ,  $\text{Cu}^{2+}$ ,  $\text{Zn}^{2+}$ ,  $\text{Sr}^{2+}$ ,  $\text{Pd}^{2+}$ ,  $\text{Cd}^{2+}$ ,  $\text{Ba}^{2+}$ ,  $\text{Hg}^{2+}$ ,  $\text{Al}^{3+}$ ,  $\text{Bi}^{3+}$ ,  $\text{Cr}^{3+}$ ) compared to the  $\text{Pb}^{2+}$ -selective parent compound.

For appropriate water solubility, various counterions were present:

- carbonate counterion:  $\text{Rb}^{2+}$ ,  $\text{Li}^+$ ,  $\text{Cs}^+$
- sulfate counterion:  $\text{Mn}^{2+}$ ,  $\text{Fe}^{2+}$
- hydroxide counterion:  $\text{Ba}^{2+}$
- chloride counterion:  $\text{Sr}^{2+}$ ,  $\text{Al}^{3+}$ ,  $\text{Hg}^{2+}$ ,  $\text{Bi}^{3+}$ ,  $\text{Fe}^{3+}$
- iodide counterion:  $\text{Cd}^{2+}$
- acetate counterion:  $\text{K}^+$ ,  $\text{Ni}^{2+}$ ,  $\text{Co}^{2+}$ ,  $\text{Na}^+$ ,  $\text{Cu}^{2+}$ ,  $\text{Ag}^+$ ,  $\text{Ca}^{2+}$ ,  $\text{Zn}^{2+}$ ,  $\text{Mg}^{2+}$
- nitrate counterion:  $\text{Pb}^{2+}$ ,  $\text{Cr}^{3+}$ ,  $\text{Pd}^{2+}$ .

The coordination of these counterions did not take place.
